# Supplementary material for: Photocatalytic H2 production in aqueous solution with host-guest inclusions formed by insertion of an FeFe-hydrogenase mimic and an organic dye into cyclodextrins
Source: Royal Society of Chemistry journal article supplement (doi:10.1039/c2ee22109h), 2012-01-01
Supplement: c2ee22109h.pdf [file c2ee22109h.pdf]

## Supporting Information

### Photocatalytic H<sub>2</sub> production in aqueous solution with host-guest inclusions formed by insertion of an FeFe-hydrogenase mimic and organic dye into cyclodextrins respectively

Xueqiang Li,<sup>a</sup> Mei Wang,<sup>\*a</sup> Dehua Zheng,<sup>a</sup> Kai Han,<sup>a</sup> Jingfng Dong,<sup>a</sup> Licheng Sun<sup>\*ab</sup>

<sup>a</sup> State Key Laboratory of Fine Chemicals, DUT-KTH Joint Education and Research Center on Molecular Devices, Dalian University of Technology (DUT), Dalian, 116012, China

<sup>b</sup> Department of Chemistry, KTH Royal Institute of Technology, Stockholm, 10044 Sweden  
E-mail: [symbueno@dlut.edu.cn](mailto:symbueno@dlut.edu.cn)

#### Experimental Section

**Chemicals.** Eosin Y and Rose Bengal were purchased from Sigma-Aldrich and used as received. Diiron complex **1** was prepared according to the literature.<sup>1</sup>  $\beta$ -Cyclodextrin was purchased from Tianjin Chemical Factory, China and recrystallized twice before used. Triethylamine (TEA) was freshly distilled prior to use and stored under nitrogen atmosphere. The water used in this experiment was twice distilled deionized water.

**UV-Vis, fluorescence, fluorescence lifetime and induced circular dichroism (ICD).** UV-Vis absorption measurements were carried out on an Agilent 8453 spectrophotometer. Photoluminescence spectra were recorded using a FluoroMax-4P fluorimeter (Horiba Jobin Yvon Inc.). Fluorescence lifetime was obtained with a Tempro-01 system time-correlated single-photon counting apparatus (Horiba Jobin Yvon Inc.) with a 450 nm LED excitation source. Induced circular dichroism spectra were measured by a Jasco J-810 dichrograph in a 1 cm optical path cuvette.

**Electrochemistry.** Electrochemical measurements were recorded in a three-electrode cell under

argon atmosphere using a BAS-100W electrochemical workstation. The working electrode was a glassy carbon disk (diameter, 3 mm) successively polished with 3 and 1  $\mu\text{m}$  diamond pastes and sonicated in ion-free water for 10 min. The auxiliary electrode was a platinum wire and the reference electrode was a saturated KCl Ag/Ag<sup>+</sup> electrode. A solution of 1 M KCl in deionized water was used as electrolyte. All aqueous potentials are reported relative to the Ag/AgCl couple. Deionized water was used as solvent and the sample was bubbled with argon for 20 min before measurement.

**MS and <sup>1</sup>H NMR spectroscopy.** Electrospray ionization mass spectra were recorded on a Q-TOF Micromass spectrometer (Manchester, England). All <sup>1</sup>H NMR measurements were carried out in H<sub>2</sub>O at 298 K with a Varian DLG-400 instrument. Chemical shifts were referenced to the internal water signal at 4.61 ppm.

**Photodegradation of 1 monitored by IR spectroscopy.** The IR spectra were recorded using an IFS 66v/S FTIR spectrometer (Bruker) equipped with a liquid nitrogen cooled MCT-A detector. The aqueous solution of **1** was freeze-pump-thaw deoxygenated three times and protected with argon before irradiated by Xe lamp (500 W) with a cutoff filter ( $\lambda > 450$  nm). After the solution was irradiated for a certain period, the light was turned off and the probe was put into the solution under protection of argon before collection of an IR spectrum, because the AgBr-containing probe cannot be directly lighted. Upon completion of the IR measurement, the probe was removed from the Schlenk bottle and the solution was lighted again under argon.

**Job's Plot method.** Solutions for Job's plots were prepared by mixing appropriate quantities of **1** and  $\beta$ -CD in water to keep their sum concentration constant but make the molecular fraction of  $\beta$ -CD varied from 0 to 100%.

**A general procedure for photocatalysis.** The pH of the solution of TEA (10% v/v) in deionize

water was adjusted to the desired pH by addition of hydrochloric acid as required and measured with a PHS-25 pH meter. In a typical experiment for photo-induced H<sub>2</sub> production, EY<sup>2-</sup> (1.62 mg, 2.5 μmol), complex **1** (1.43 mg, 2.5 μmol), and β-cyclodextrin (28.4 mg, 25 μmol) were added to the 10 vol% TEA aqueous solution (5 mL) with magnetic stirring under nitrogen atmosphere. The solution was then freeze-pump-thaw degassed three times and irradiated using a Xe lamp (500 W) with a cutoff filter ( $\lambda > 450$  nm).

The gas phase of the reaction system was analyzed by a GC 7890T instrument with a thermal conductivity detector, a 5 Å molecular sieve column (2 mm × 2 m) with nitrogen as carrying gas. The amount of hydrogen generated was determined by the external standard method and the hydrogen dissolved in the solution was neglected.

**Calculation method for TON.** TON (turnover number) = molecules of H<sub>2</sub> per molecule of catalyst, which was calculated by the following equations:

$$\text{TON}_{\text{cat.}} = \frac{n_{\text{H}_2}}{n_{\text{cat.}}} = \frac{V_{\text{H}_2}/V_{\text{m,H}_2,25^\circ\text{C}}}{n_{\text{cat.}}}$$

The calculation of  $V_{\text{m,H}_2,25^\circ\text{C}}$  was carried out using van der waals equation as below:

$$V_{\text{m,H}_2,25^\circ\text{C}} = \frac{RT}{p} + b - \frac{a}{RT} = 24.48 \text{ mL/mmol}$$

Where  $R = 8.3145 \text{ cm}^3 \text{ Pa mol}^{-1} \text{ K}^{-1}$ ;  $T = 298.15 \text{ K}$ ;  $p = 101325 \text{ Pa}$ ;  $b = 26.6 \text{ cm}^3 \text{ mol}^{-1}$ ;  $a = 24.7 \times 10^9 \text{ cm}^6 \text{ Pa mol}^{-2}$ .

$V_{\text{H}_2}$  was determined by fitting the area of H<sub>2</sub> showed by GC to an external standard.

**Quantum yield measurement.** A sample containing **1** ( $5.0 \times 10^{-4} \text{ M}$ ), TEA (10% v/v) in deionized water was used as a blank. The solution containing EY ( $5.0 \times 10^{-4} \text{ M}$ ), **1** ( $5.0 \times 10^{-4} \text{ M}$ ), and TEA (10% v/v) was used as a sample. The powers of the light passing through the blank and the sample were measured with a L30 A–BB–13 thermal sensor and Nova II power meter using a 300 W

Xe lamp equipped with a 520 nm band pass filter. The difference between the power of light passing through the blank and that through the sample was considered to be absorbed by the dye. Each value of quantum yield was tested three times to reduce errors.

The photon flux was determined by equation (1):

$$F_{\text{Photon}} = 2 \frac{P \lambda}{S_{\text{Beam}} h c} \quad (1)$$

Where  $P$  (in W) is determined by the difference in the power of light passing through the blank and the sample, respectively;  $\lambda$  is the irradiation wavelength number (520 nm);  $S_{\text{Beam}}$  is the beam area;  $h$  is Plank's constant; and  $c$  is the speed of light.

The quantum yields ( $\phi$ ) were determined by equation (2):

$$\phi(1/2\text{H}_2) = 2 \frac{n(\text{H}_2) \times N}{F_{\text{Photon}} S_{\text{Beam}} t} = 2 \frac{n(\text{H}_2) \times N h c}{P \lambda t} \quad (2)$$

Where the amount of hydrogen produced ( $n(\text{H}_2)$ ) was estimated from GC analysis;  $N$  is the Avogadro constant, and  $t$  is the irradiation period.

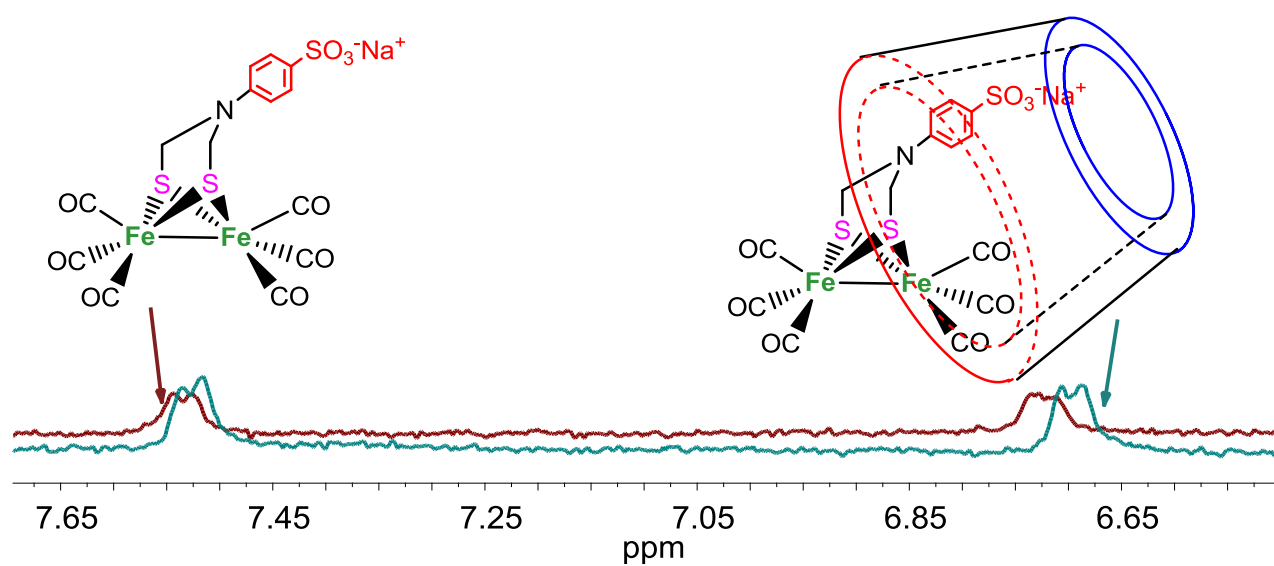

**Fig. S1**  $^1\text{H}$  NMR spectra of **1** (0.1 mM) and **1** with 5 equiv.  $\gamma$ -CD in  $\text{D}_2\text{O}$  at 298 K.

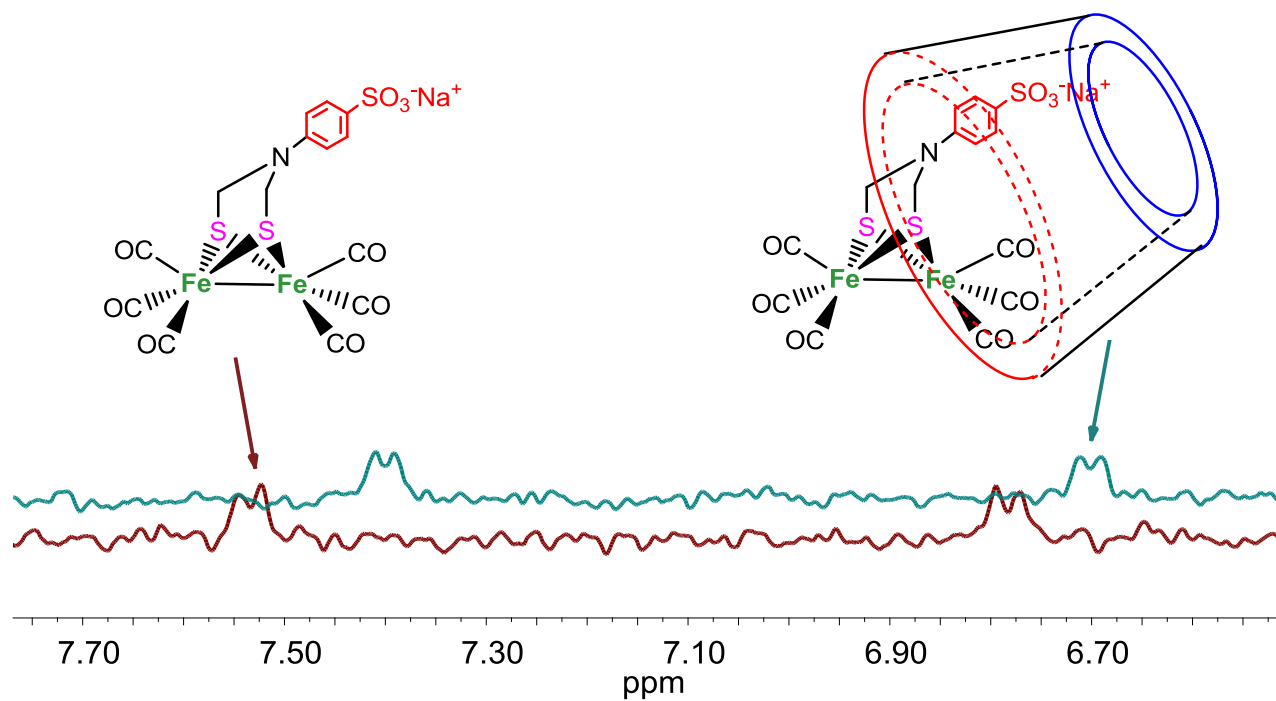

**Fig. S2**  $^1\text{H}$  NMR spectra of **1** (0.1 mM) and **1** with 5 equiv.  $\beta$ -CD in  $\text{D}_2\text{O}$  at 298 K.

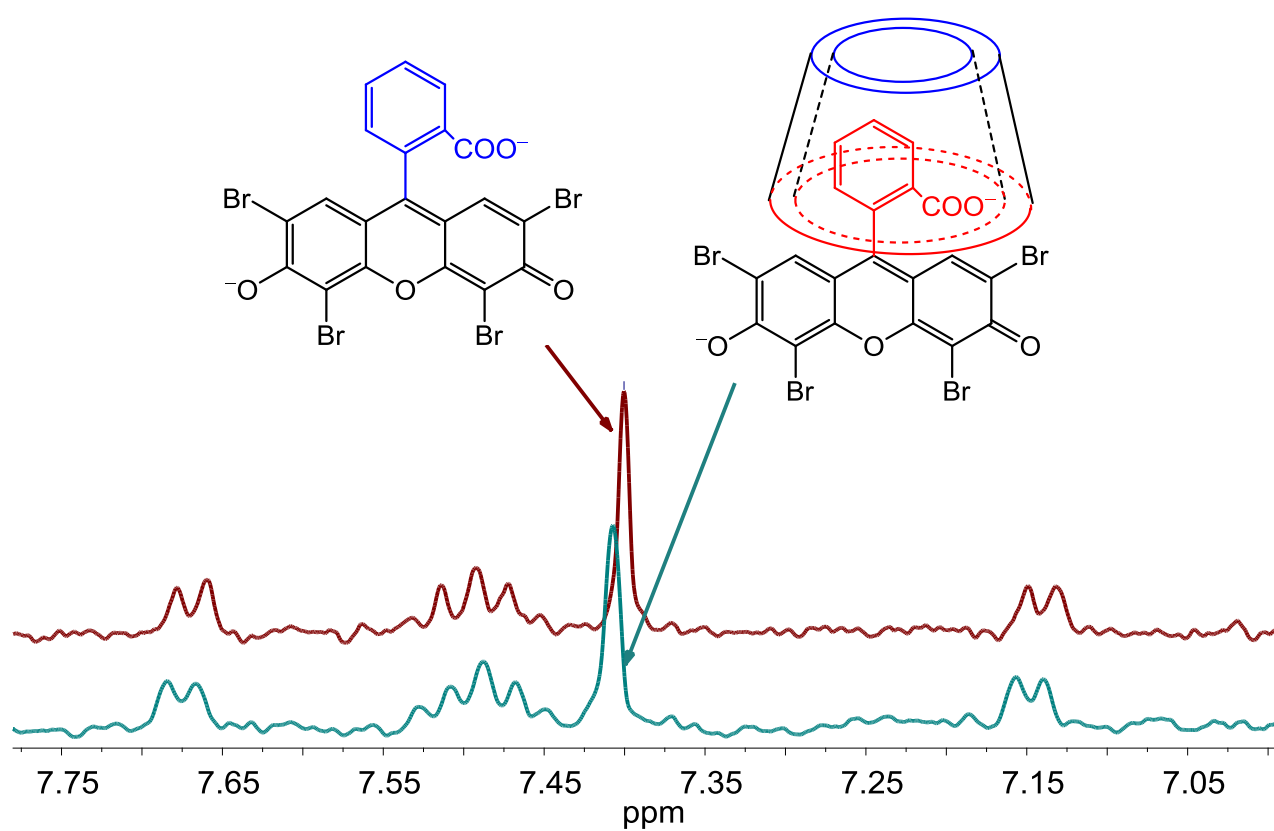

**Fig. S3**  $^1\text{H}$  NMR of EY (0.1 mM) and EY with 5 equiv.  $\beta$ -CD in  $\text{D}_2\text{O}$  at 298 K.

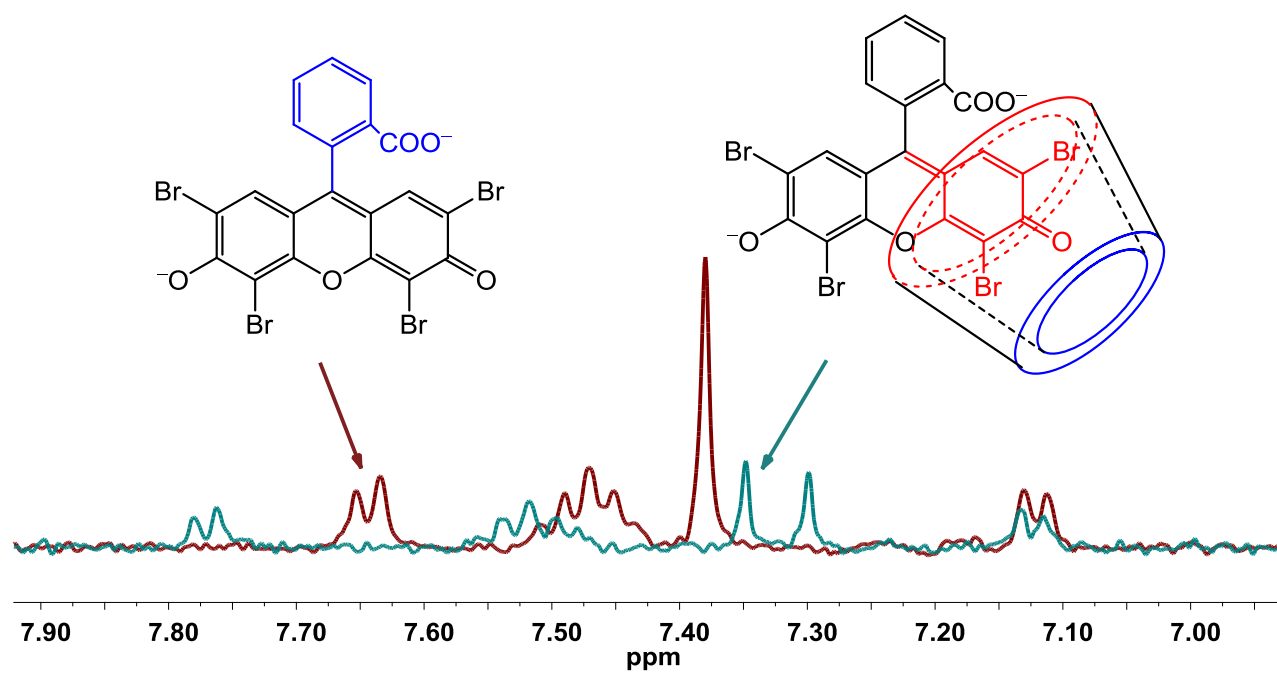

**Fig. S4**  $^1\text{H}$  NMR of EY (0.1 mM) and EY with 5 equiv.  $\gamma$ -CD in  $\text{D}_2\text{O}$  at 298 K.

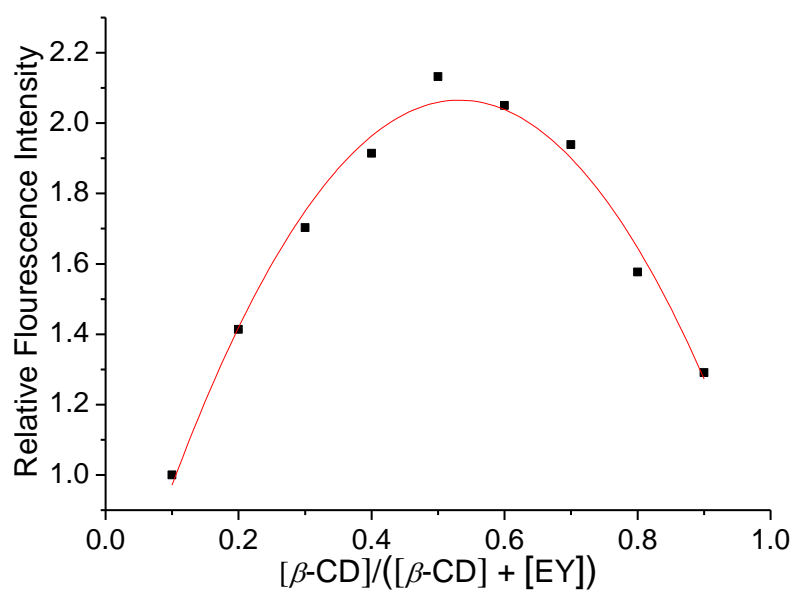

**Fig. S5** A Job plot based on the changes in fluorescence intensity with variation of the ratio of  $[\beta\text{-CD}]/([\beta\text{-CD}] + [\text{EY}])$  in water ( $[\beta\text{-CD}] + [\text{EY}] = 3 \times 10^{-5} \text{ M}$ ). Equation for the best fit line is:  $y = 0.4069136 + 6.2326439x - 5.8558027x^2$  ( $R^2 = 0.9800329$ ).

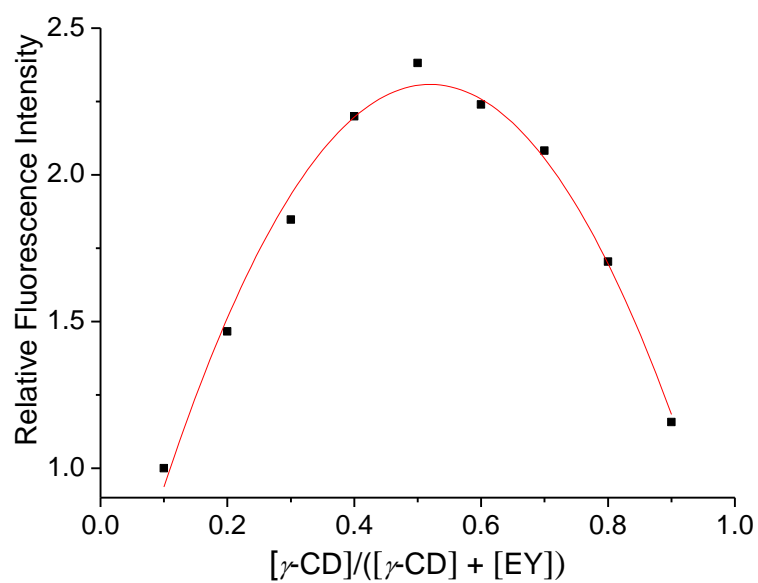

**Fig. S6** A Job plot based on the changes in fluorescence intensity with variation of the ratio of  $[\gamma\text{-CD}]/([\gamma\text{-CD}] + [\text{EY}])$  in water ( $[\gamma\text{-CD}] + [\text{EY}] = 3 \times 10^{-5} \text{ M}$ ). Equation for the best fit line is:  $y = 0.2053163 + 8.0914859x - 7.7830231x^2$  ( $R^2 = 0.9857499$ ).

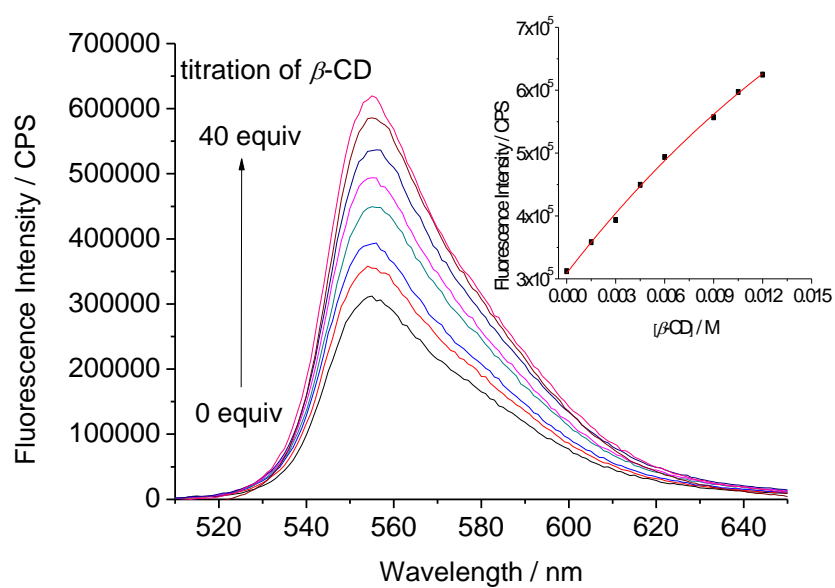

**Fig. S7** Fluorescence spectra of EY in water with addition of  $\beta$ -CD ( $[\text{EY}] = 3 \times 10^{-5} \text{ M}$ ); Inset: Increase of the fluorescence intensity maximum of EY with addition of  $\beta$ -CD.

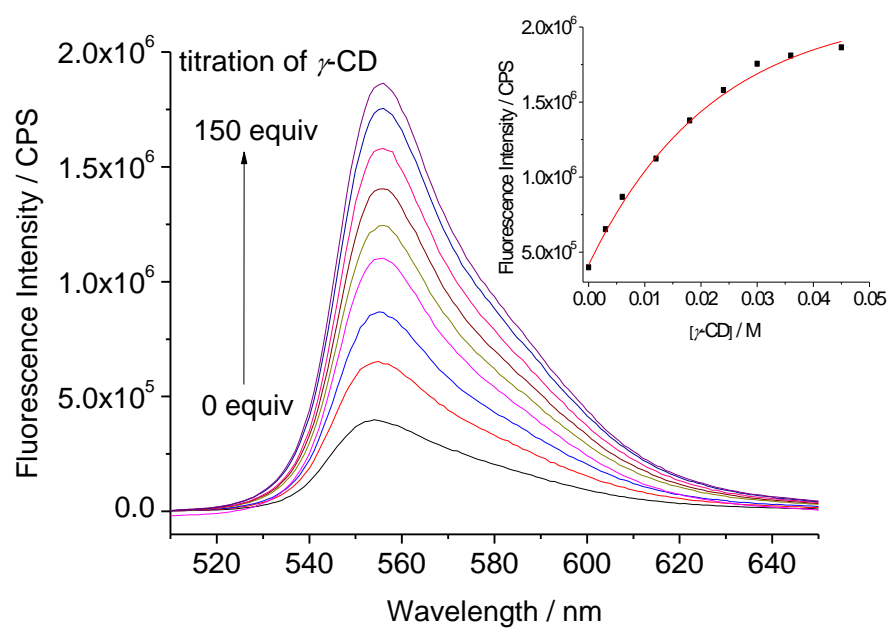

**Fig. S8** Fluorescence spectra of EY in water with addition of  $\gamma$ -CD ( $[EY] = 3 \times 10^{-5}$  M); Inset: Increase of the fluorescence intensity maximum of EY with addition of  $\gamma$ -CD.

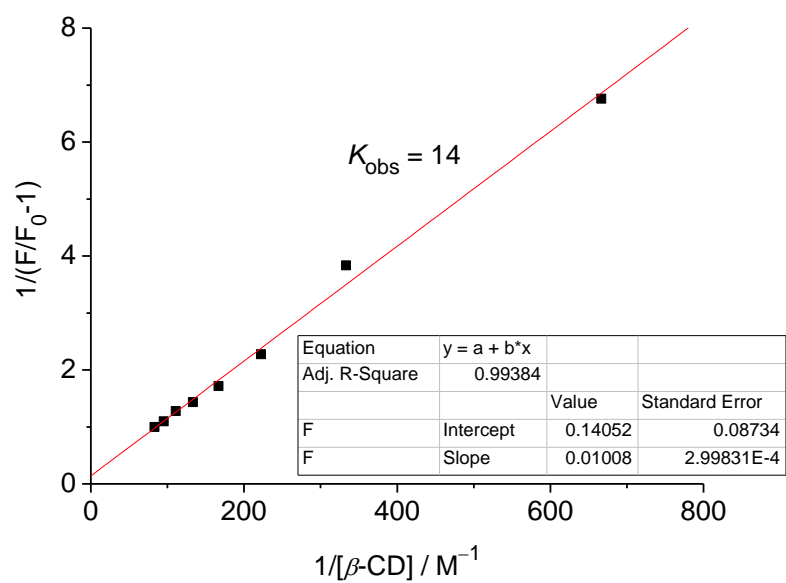

**Fig. S9** The modified Stern–Volmer plot with  $1/(F/F_0 - 1)$  against  $1/[\beta\text{-CD}]$  for calculation of binding constant according to the data of Fig. S7.

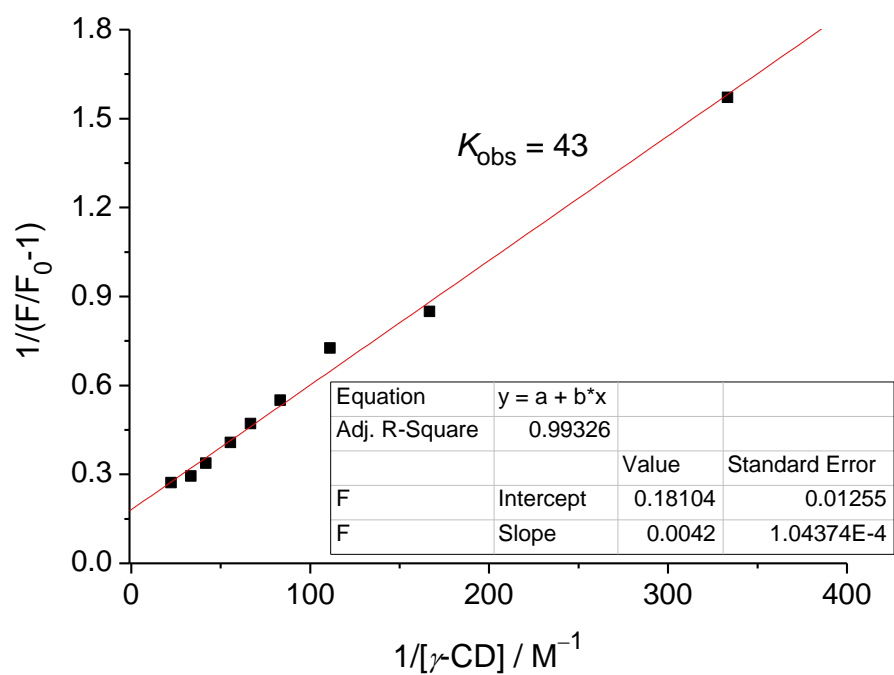

**Fig. S10** The modified Stern–Volmer plot with  $1/(F/F_0 - 1)$  against  $1/[\gamma\text{-CD}]$  for calculation of binding constant according to the data of Fig. S8.

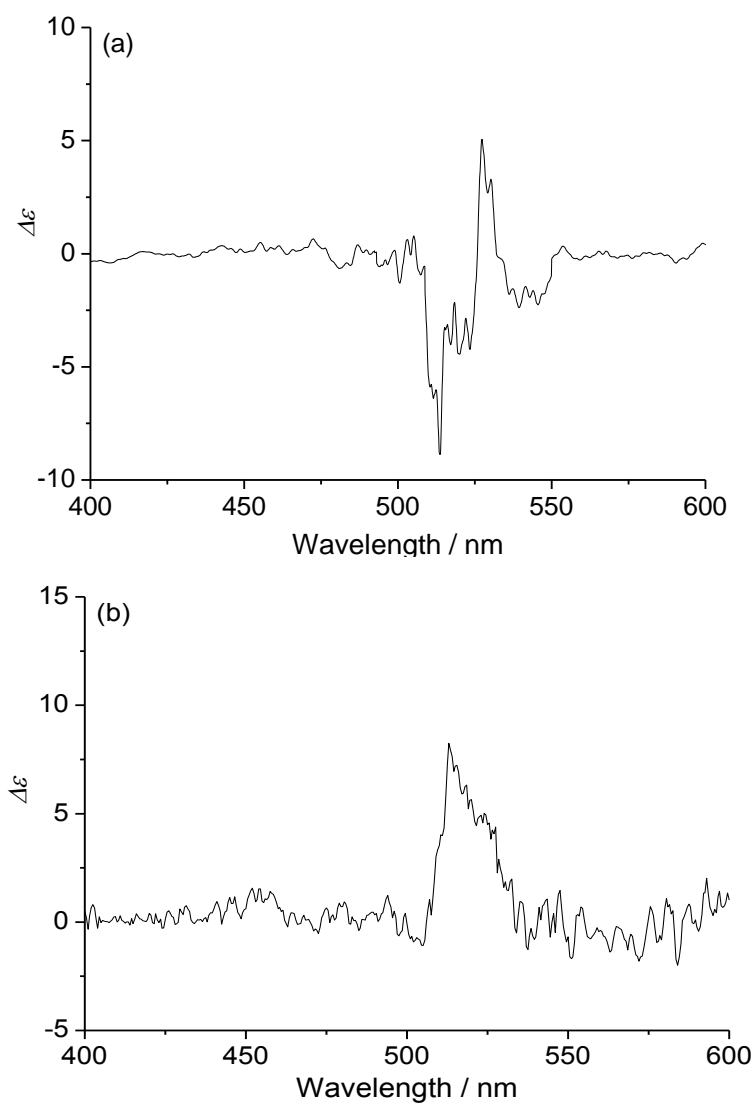

**Fig. S11** Induced circular dichroism spectra of EY ( $1 \times 10^{-5}$  M) in water with addition of (a) 10 equiv.  $\beta$ -CD and (b) 10 equiv.  $\gamma$ -CD.

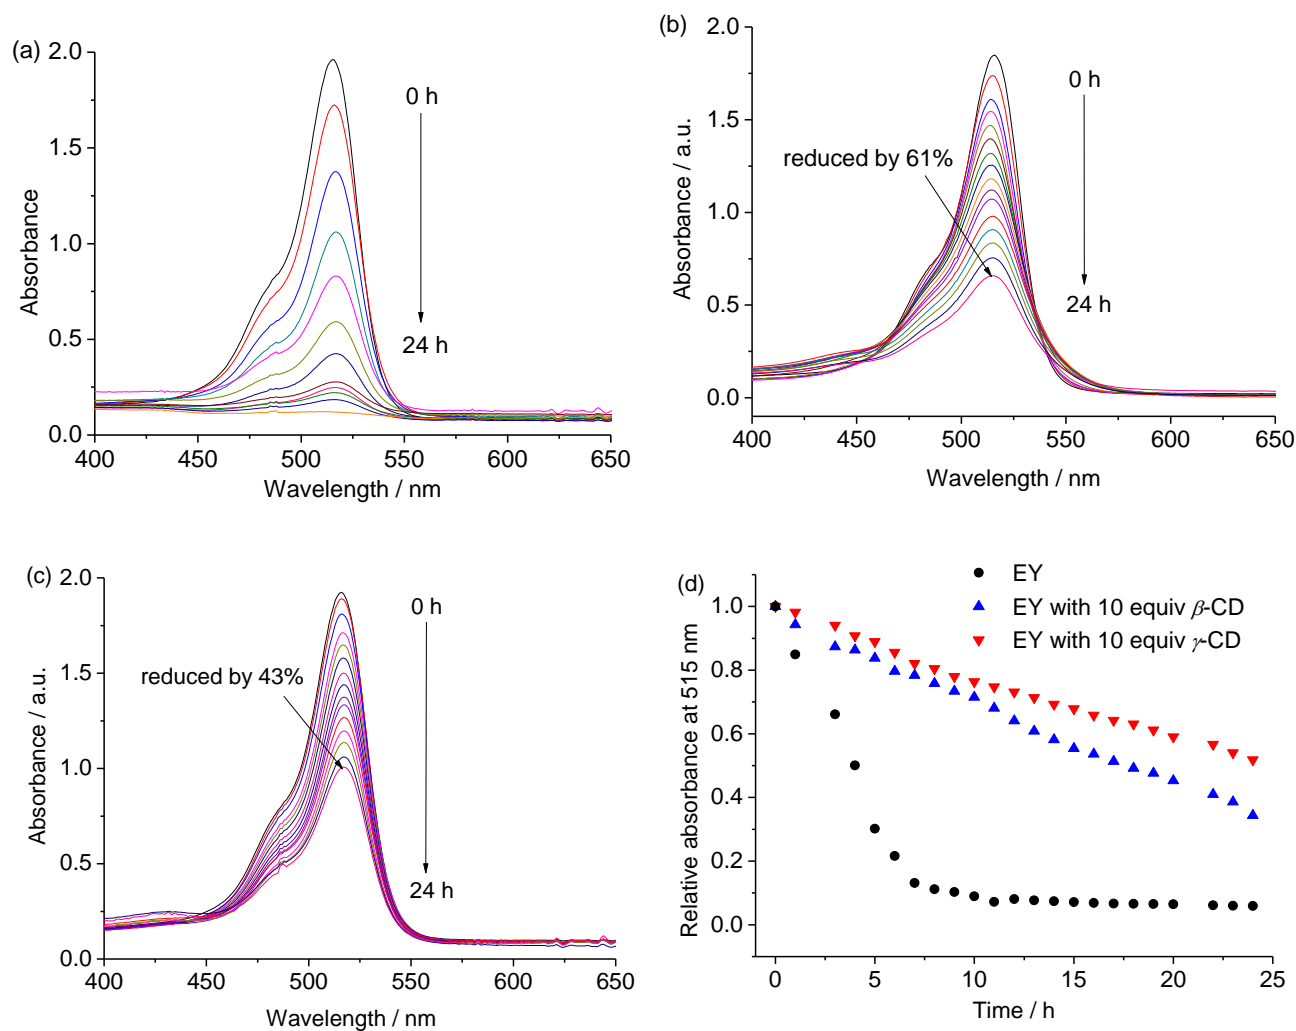

**Fig. S12** Photodegradation of EY (30  $\mu\text{M}$ ) in water, (a) in the absence of CD; (b)  $[\beta\text{-CD}] = 300 \mu\text{M}$ ; (c)  $[\gamma\text{-CD}] = 300 \mu\text{M}$ ; (d) plot of relative absorbance of EY at 515 nm versus irradiation time.

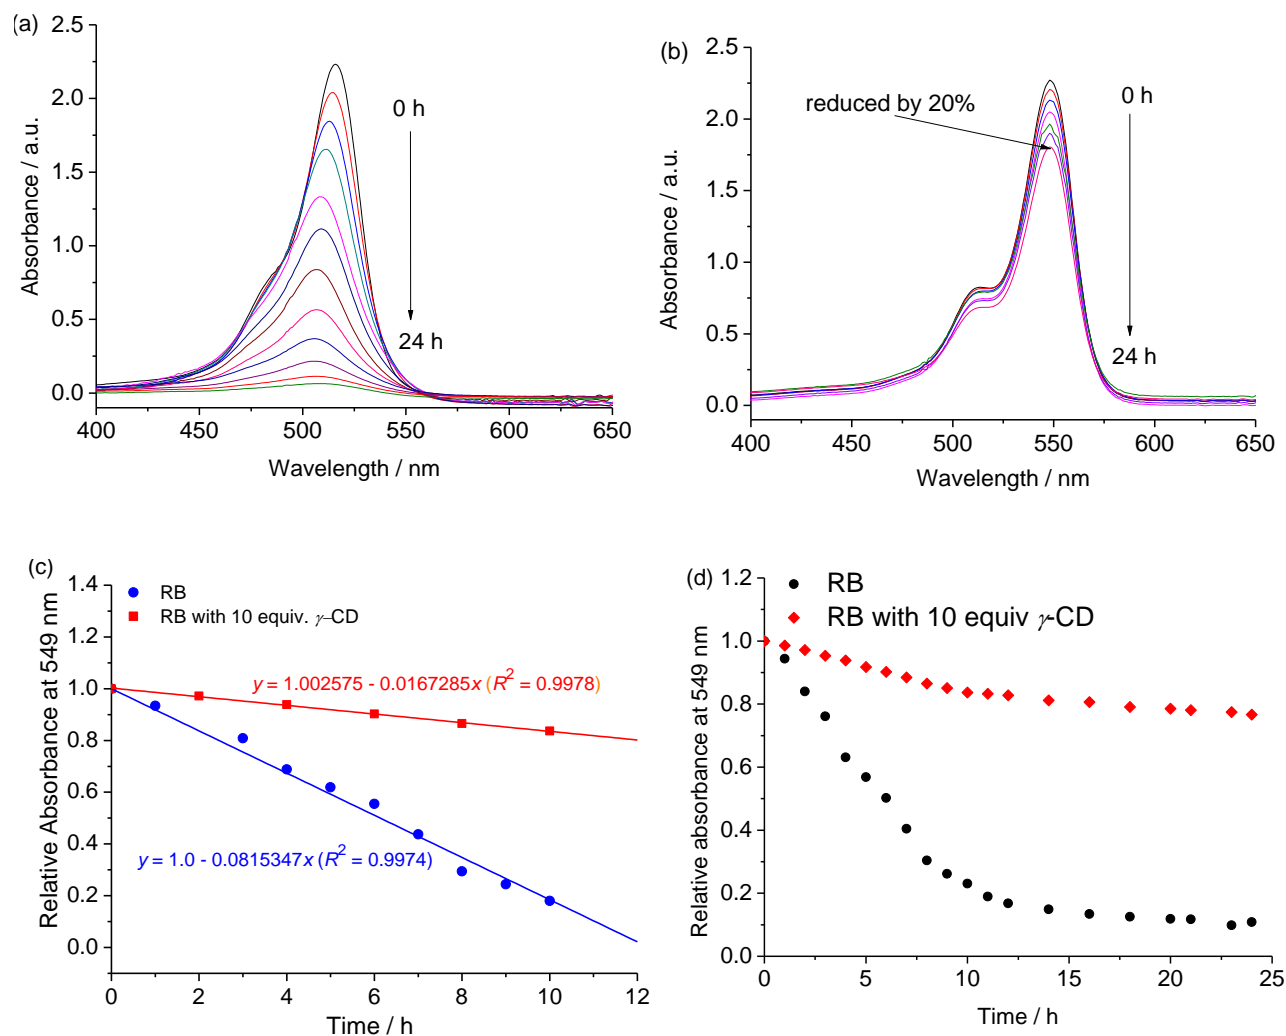

**Fig. S13** Photodegradation of RB (30 μM) in water, (a) in the absence of CD; (b) [γ-CD] = 300 μM; The UV-vis spectra for photodegradation of RB in the presence of 10 equiv. β-CD are essentially identical with Fig. S13(a); (c) Photodegradation curves of RB (3.0 × 10<sup>-5</sup> M) in the absence and presence of γ-CD in water; (d) plot of relative absorbance of RB at 549 nm versus irradiation time.

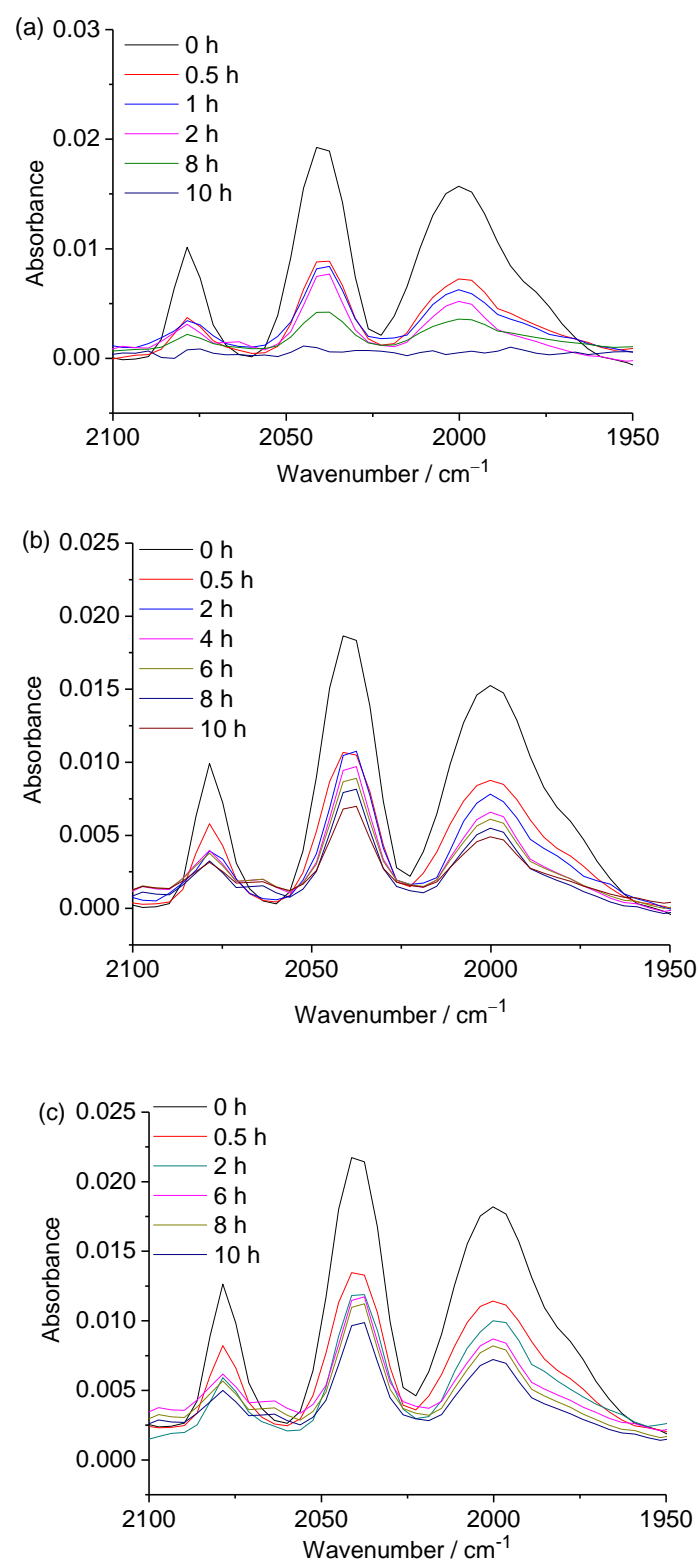

**Fig. S14** Photodegradation of (a) **1** (60  $\mu\text{M}$ ), (b) **1** with 10 equiv.  $\beta$ -CD, and (c) **1** with 10 equiv.  $\gamma$ -CD in water monitored by IR spectroscopy.

**Table S1** Photoinduced H<sub>2</sub> production of the EY/**1** system at different conditions<sup>a</sup>

| Donor        | pH      | TON <sup>b</sup> |
|--------------|---------|------------------|
| 10 vol% TEA  | pH = 8  | 0.1              |
|              | pH = 9  | 2.2              |
|              | pH = 10 | 8.0              |
|              | pH = 11 | 5.8              |
|              | pH = 12 | 1.1              |
| 5 vol% TEA   | pH = 10 | 0.2              |
| 10 vol% TEA  | pH = 10 | 8.0              |
| 15 vol% TEA  | pH = 10 | 1.2              |
| 10 vol% TEOA | pH = 6  | 0.5              |
|              | pH = 7  | 0.8              |
|              | pH = 8  | 0.3              |
|              | pH = 9  | 0                |
|              | pH = 10 | 0                |

<sup>a</sup> Conditions: EY  $5.0 \times 10^{-4}$  M, **1**  $5.0 \times 10^{-4}$  M, in water at 25 °C.

<sup>b</sup> TONs were obtained over 10-h irradiation.

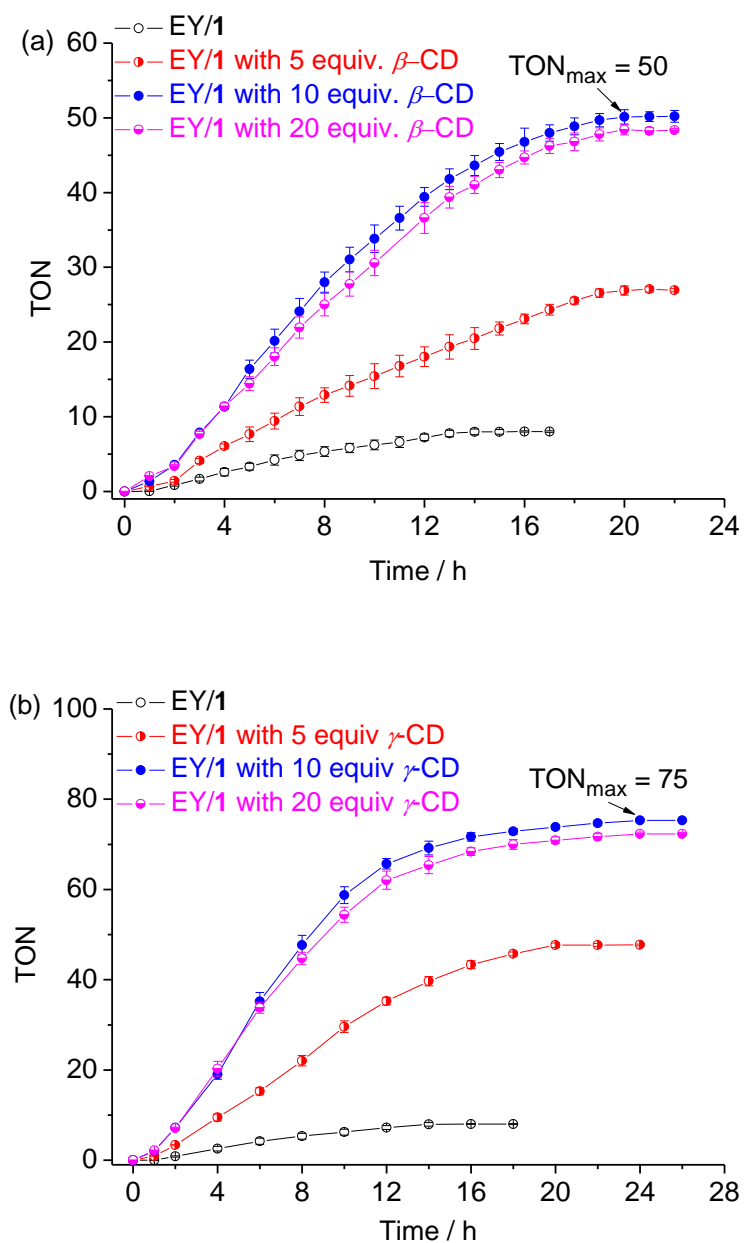

**Fig. S15** Photocatalytic H<sub>2</sub> production by the EY/1 system with different amounts of (a)  $\beta$ -CD and (b)  $\gamma$ -CD in 10% TEA aqueous solution at pH 10 ([EY] = [1] =  $5.0 \times 10^{-4}$  M).

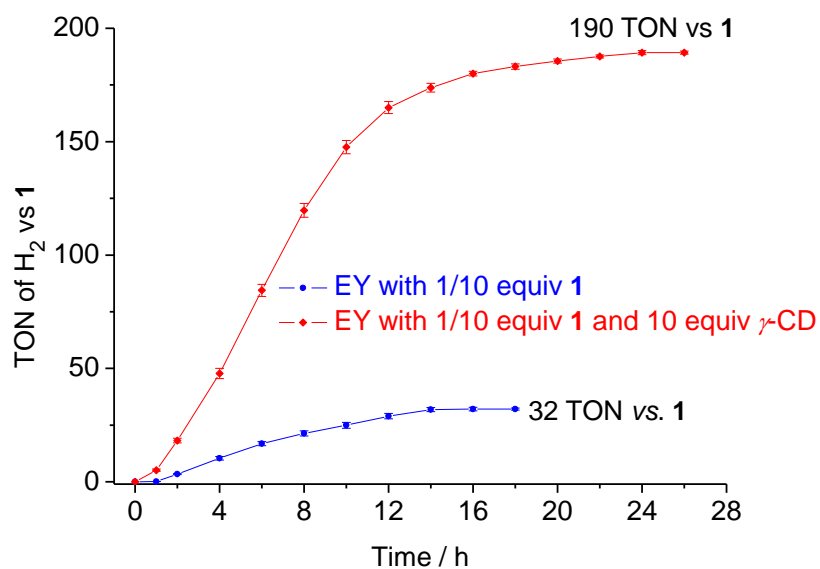

**Fig. S16** Photocatalytic H<sub>2</sub> production with EY ( $5.0 \times 10^{-4}$  M)/**1** ( $5.0 \times 10^{-5}$  M) system in the absence and presence of γ-CD in 10% TEA aqueous solution at pH 10.

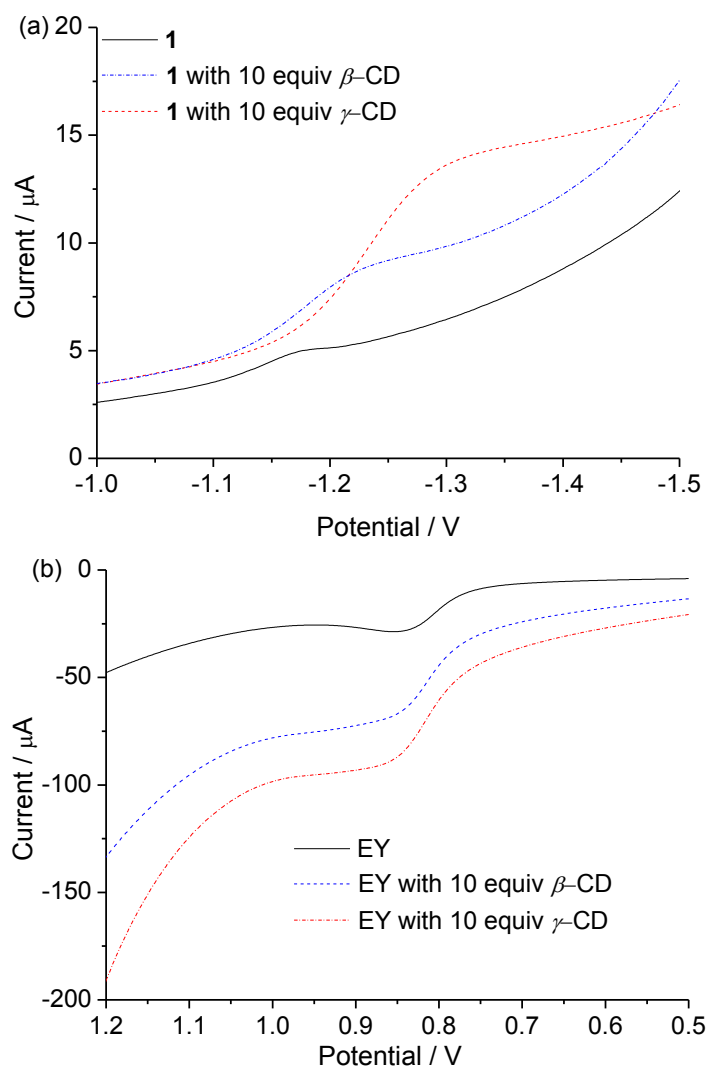

**Fig. S17** Cyclic voltammograms of (a) **1** ( $1.0 \times 10^{-5}$  M) and (b) EY ( $1.0 \times 10^{-5}$  M) in water in the absence and presence of  $\beta$ -CD and  $\gamma$ -CD using a saturated KCl Ag/AgCl reference electrode.

**Table S2** Redox potentials of **1**, EY, and RB as well as the calculated energies and redox potentials of the singlet and triplet excited states of EY and RB<sup>a</sup>

|                         | $E_{\text{ox}}/\text{V}$ | $E_{\text{red}}/\text{V}$ | $^1E_{00}/\text{V}$ | $^3E_{00}/\text{V}$ | $^1E_{\text{ox}}/\text{V}$ | $^1E_{\text{red}}/\text{V}$ | $^3E_{\text{ox}}/\text{V}$ | $^3E_{\text{red}}/\text{V}$ |
|-------------------------|--------------------------|---------------------------|---------------------|---------------------|----------------------------|-----------------------------|----------------------------|-----------------------------|
| EY                      | 0.841                    | -1.00                     | 2.34                | 1.89                | -1.499                     | 1.34                        | -1.049                     | 0.89                        |
| EY+ $\beta$ -CD         | 0.853                    | -0.97                     | 2.34                | 1.89                | -1.487                     | 1.37                        | -1.037                     | 0.92                        |
| EY+ $\gamma$ -CD        | 0.871                    | -0.95                     | 2.34                | 1.89                | -1.469                     | 1.39                        | -1.019                     | 0.94                        |
| RB                      | 0.84                     | -1.00                     | 2.21                | 1.83                | -1.37                      | 1.21                        | -0.99                      | 0.83                        |
| RB+ $\gamma$ -CD        | 0.85                     | -0.99                     | 2.21                | 1.83                | -1.36                      | 1.22                        | -0.98                      | 0.84                        |
| <b>1</b>                |                          | -1.175                    |                     |                     |                            |                             |                            |                             |
| <b>1</b> + $\beta$ -CD  |                          | -1.222                    |                     |                     |                            |                             |                            |                             |
| <b>1</b> + $\gamma$ -CD |                          | -1.294                    |                     |                     |                            |                             |                            |                             |

<sup>a</sup> All potentials are reported relative to Ag/AgCl in water using 1.0 M KCl as electrolyte.

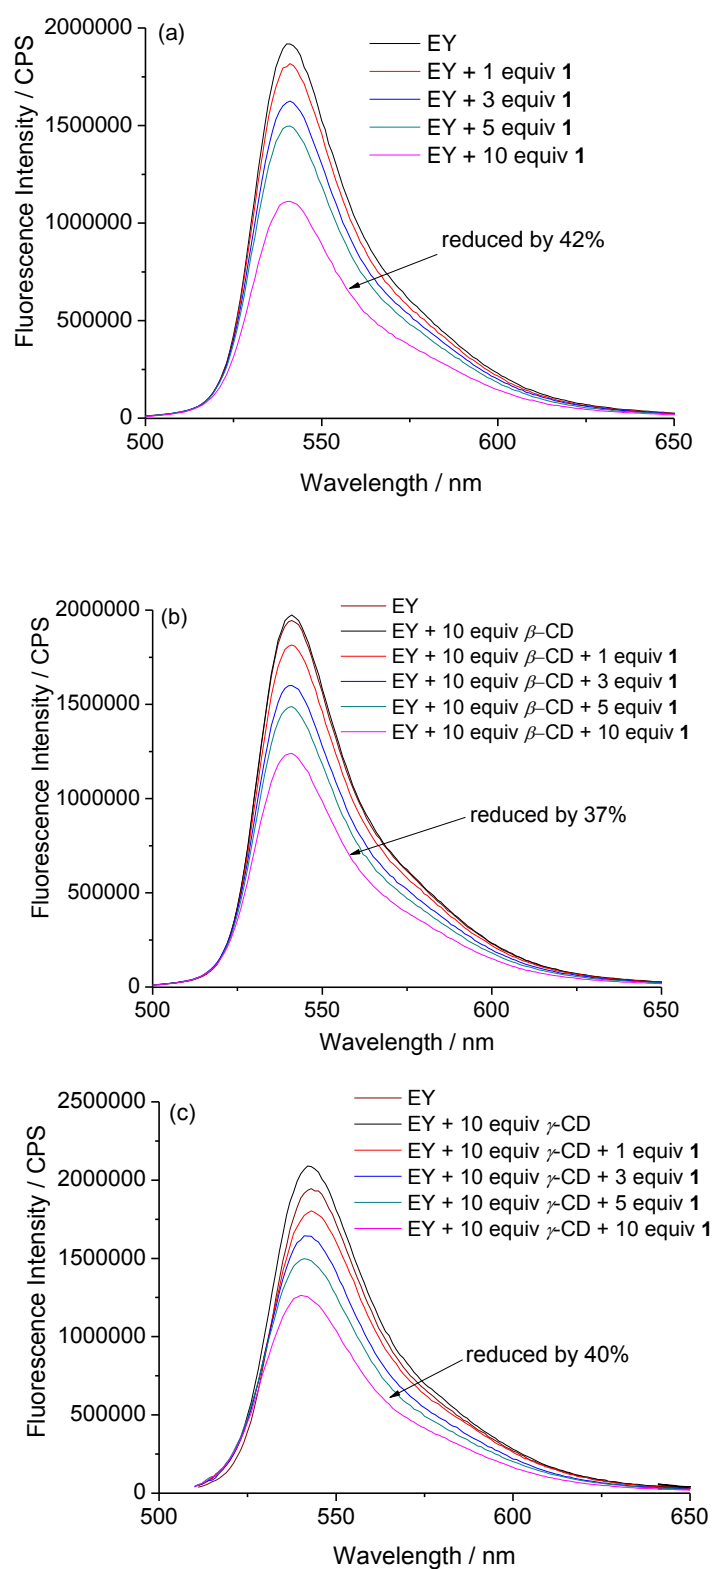

**Fig. S18** The fluorescence spectra of EY ( $3 \times 10^{-5}$  M) with addition of 1: (a) in the absence of cyclodextrin; (b) in the presence of  $\beta$ -CD ( $3 \times 10^{-4}$  M); (c) in the presence of  $\gamma$ -CD ( $3 \times 10^{-4}$  M).

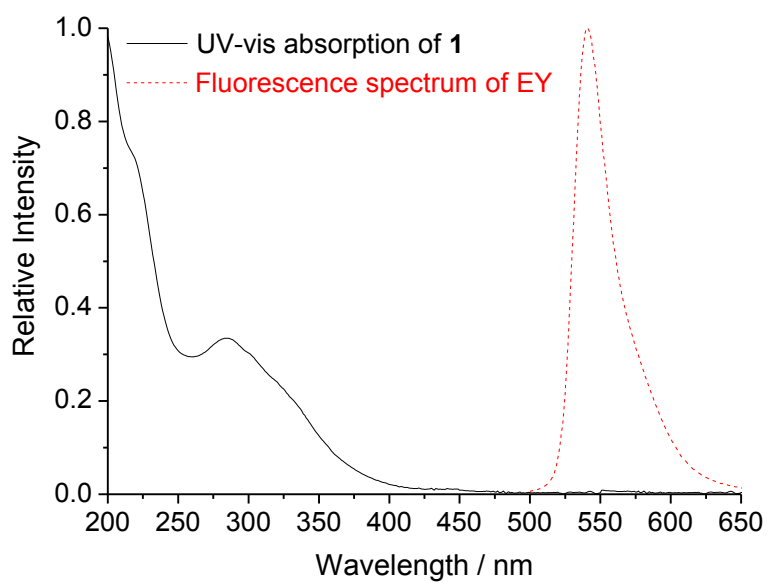

**Fig. S19** The UV-vis absorption spectrum of **1** and fluorescence emission spectrum of EY (The intensity of each band is normalized by its initial intensity).

**Table S3** Lifetime of EY and RB ( $3 \times 10^{-5}$  M) with different concentration of  $\beta$ -CD and  $\gamma$ -CD in water

|                              | $\tau_f^a$ / ns | $\phi_f^b$ |
|------------------------------|-----------------|------------|
| EY                           | 1.2803          | 0.163      |
| EY + 10 equiv. $\beta$ -CD   | 1.2947          | 0.168      |
| EY + 50 equiv. $\beta$ -CD   | 1.3073          | 0.174      |
| EY + 100 equiv. $\beta$ -CD  | 1.3366          | 0.179      |
| EY + 10 equiv. $\gamma$ -CD  | 1.3187          | 0.176      |
| EY + 50 equiv. $\gamma$ -CD  | 1.4657          | 0.199      |
| EY + 100 equiv. $\gamma$ -CD | 1.5365          | 0.219      |
| RB                           | 0.1059          | 0.018      |
| RB + 10 equiv. $\beta$ -CD   | 0.1066          | 0.020      |
| RB + 10 equiv. $\gamma$ -CD  | 0.1282          | 0.02439    |
| RB + 50 equiv. $\gamma$ -CD  | 0.1454          | 0.02443    |
| RB + 100 equiv. $\gamma$ -CD | 0.1657          | 0.02539    |

<sup>a</sup> Fit by a single index model. <sup>b</sup>  $\phi_f$  was calculated using following equation and taking the quantum yield of Rhodamine B in methanol as reference.<sup>2</sup>

$$Y_u = Y_s \times \left( \frac{F_u}{F_s} \right) \times \left( \frac{A_s}{A_u} \right) \times \left( \frac{n_u^2}{n_s^2} \right) \times \left( \frac{\lambda_{\text{exs}}}{\lambda_{\text{exu}}} \right)$$

Where  $Y_u$  is the fluorescence quantum yield of the sample solution to be measured and  $Y_s$  is the reference solution;  $F_u$  and  $F_s$  are the integral intensity;  $A_u$  and  $A_s$  stand for absorption values;  $n_u$  and  $n_s$  denote the refractive indexes of the solvents; and subscripts  $u$  and  $s$  refer respectively to the sample and standard substance. The fluorescence quantum yield of Rhodamine B in methanol is 0.69.<sup>2</sup>

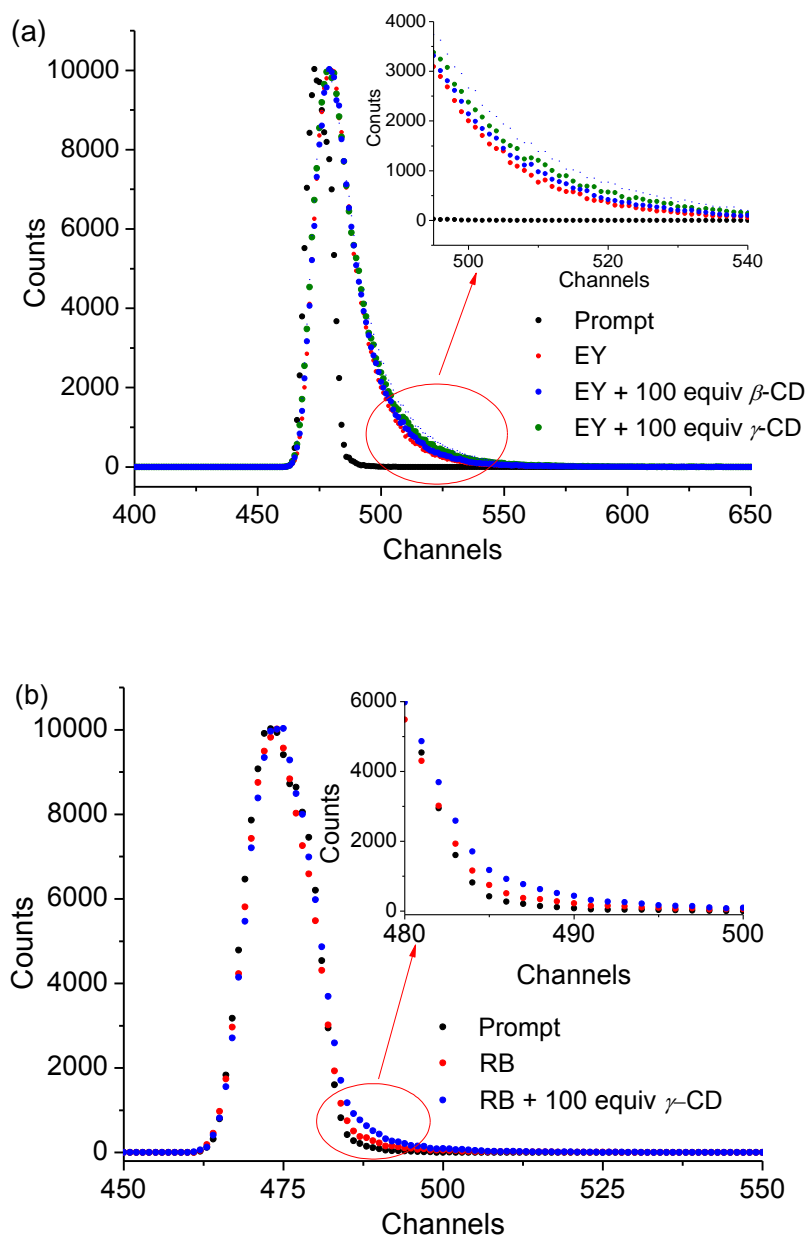

**Fig. S20** The fluorescence lifetimes of (a) EY and (b) RB ( $3 \times 10^{-5}$  M) in the absence and presence of cyclodextrin in water at 298 K. The samples were excited with a 450 nm LED and the signals were collected at 541 nm for EY and 573 for RB.

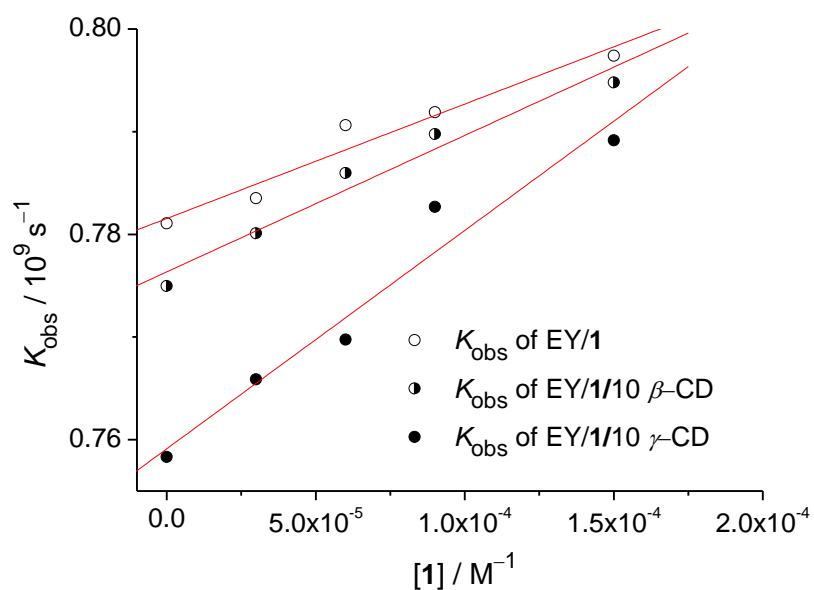

**Fig. S21** The quenching constant plot of EY/**1** ( $[EY] = [1] = 3 \times 10^{-5} \text{ M}$ ) system with addition of  $\beta$ -CD and  $\gamma$ -CD ( $3 \times 10^{-4} \text{ M}$ ). Equations for the best fit line are:  $y = 0.7815416 + 111.4792837x$  ( $R^2 = 0.933$ ) for the EY/**1** system;  $y = 0.7763433 + 132.9038063x$  ( $R^2 = 0.950$ ) for the EY/**1**/ $\beta$ -CD system;  $y = 0.7591164 + 212.6920464x$  ( $R^2 = 0.940$ ) for the EY/**1**/ $\gamma$ -CD system.

## References

- 1 M. L. Singleton, J. H. Reibenspies and M. Y. Darensbourg, *J. Am. Chem. Soc.*, 2010, **132**, 8870–8871.
- 2 R. A. Velapoldi and H. H. Tonnesen. *Journal of Fluorescence*, 2004, **14**, 465–472.
